# Supplementary material for: Re-Evaluating Human Cytomegalovirus Vaccine Design: Prediction of T Cell Epitopes
Source: MDPI journal article supplement (doi:10.3390/vaccines11111629), 2023-10-24
Supplement: s1 [file s1]

**Table S1.** HCMV proteins in each set of the analysis. Column headings indicate set names, number of HCMV proteins in each set, and the rule applied to each set from left to right (see also Figure 1). Shaded rows indicate proteins excluded at each step. The initial exclusion notes the protein and associated measures, and subsequent exclusions are blank. For example, TRL1 (4th row of proteins) was included in the Test Set given no T cell responders, but was excluded from the Identity Set given sequence identity below threshold, and the row is blank in subsequent sets.

\* Only the sequence of amino acids 223-484 aligns with US15 in clinical isolates. The original annotation for US15 (CAA35282) in Sylwester et al. (Ref 55) Supplemental Table 1 also contains amino acids 1-222, but this sequence does does not align with any GenBank entry.

\*\* Only amino acids 37-161

† Median immunogenicity score significantly lower than that of UL83 (Mann Whitney).

NFL, Not Full Length (n = 12). ASO, AD169-specific ORF (n = 48). COMB, Combined exons (n = 3). DUPL, Duplication (n = 3)

| Original Set<br>n = 214 |                               |                                             | Revised Set<br>n = 148 | Test Set<br>n = 109<br>≤ 4 CD4 AND ≤ 4 CD8 T<br>cell responders |            |            | Identity Set<br>n = 61<br>≥ 98% sequence<br>identifiy |                                    | Affinity-HLA Set<br>n = 35<br><br>High affiity binding to<br>most HLA alleles |                                   |                                   | Final Set<br>n = 24<br><br>High immunogenicity |                                       |
|-------------------------|-------------------------------|---------------------------------------------|------------------------|-----------------------------------------------------------------|------------|------------|-------------------------------------------------------|------------------------------------|-------------------------------------------------------------------------------|-----------------------------------|-----------------------------------|------------------------------------------------|---------------------------------------|
| HCMV<br>Protein         | Gene Bank or<br>Swiss Prot ID | Reason for<br>exclusion from<br>Revised Set | HCMV<br>Protein        | HCMV<br>Protein                                                 | CD8<br>(#) | CD4<br>(#) | HCMV<br>Protein                                       | Sequence<br>identity<br>(median %) | HCMV<br>Protein                                                               | Peptides with<br>IC50≤50nM<br>(#) | Restricting<br>HLA alleles<br>(#) | HCMV<br>Protein                                | Immunogenicity<br>score<br>(median) † |
| IRL14                   | CAA35296                      | NFL                                         |                        |                                                                 |            |            |                                                       |                                    |                                                                               |                                   |                                   |                                                |                                       |
| IRS1                    | CAA35311                      |                                             | IRS1                   | IRS1                                                            | 5          | 13         |                                                       |                                    |                                                                               |                                   |                                   |                                                |                                       |
| J1I                     | CAA35310                      | ASO                                         |                        |                                                                 |            |            |                                                       |                                    |                                                                               |                                   |                                   |                                                |                                       |
| TRL1                    | CAA35449                      |                                             | TRL1                   | TRL1                                                            | 0          | 0          | TRL1                                                  | 92.3                               |                                                                               |                                   |                                   |                                                |                                       |
| TRL2                    | CAA35450                      | ASO                                         |                        |                                                                 |            |            |                                                       |                                    |                                                                               |                                   |                                   |                                                |                                       |
| TRL3                    | CAA35451                      | ASO                                         |                        |                                                                 |            |            |                                                       |                                    |                                                                               |                                   |                                   |                                                |                                       |
| TRL4                    | CAA35453                      | ASO                                         |                        |                                                                 |            |            |                                                       |                                    |                                                                               |                                   |                                   |                                                |                                       |
| TRL5                    | CAA35452                      | ASO                                         |                        |                                                                 |            |            |                                                       |                                    |                                                                               |                                   |                                   |                                                |                                       |
| TRL6                    | CAA35454                      |                                             | TRL6                   | TRL6                                                            | 0          | 0          | TRL6                                                  | 98.2                               | TRL 6                                                                         | 10                                | 7                                 |                                                |                                       |
| TRL7                    | CAA35455                      | ASO                                         |                        |                                                                 |            |            |                                                       |                                    |                                                                               |                                   |                                   |                                                |                                       |
| TRL 8                   | CAA35456                      | ASO                                         |                        |                                                                 |            |            |                                                       |                                    |                                                                               |                                   |                                   |                                                |                                       |
| TRL9                    | CAA35457                      | ASO                                         |                        |                                                                 |            |            |                                                       |                                    |                                                                               |                                   |                                   |                                                |                                       |
| TRL10                   | CAA35458                      |                                             | TRL10                  | TRL10                                                           | 1          | 3          | TRL10                                                 | 94.7                               |                                                                               |                                   |                                   |                                                |                                       |
| TRL11                   | CAA35459                      |                                             | TRL11                  | TRL11                                                           | 0          | 2          | TRL11                                                 | 96.6                               |                                                                               |                                   |                                   |                                                |                                       |
| TRL12                   | CAA35460                      |                                             | TRL12                  | TRL12                                                           | 6          | 4          |                                                       |                                    |                                                                               |                                   |                                   |                                                |                                       |

| Original Set<br>n = 214 |                               |                                             | Revised Set<br>n = 148 | Test Set<br>n = 109<br>≤ 4 CD4 AND ≤ 4 CD8 T<br>cell responders |            |            | Identity Set<br>n = 61<br>≥ 98% sequence<br>identify |                                    | Affinity-HLA Set<br>n = 35<br>High affiity binding to<br>most HLA alleles |                                   |                                   | Final Set<br>n = 24<br>High immunogenicity |                                       |
|-------------------------|-------------------------------|---------------------------------------------|------------------------|-----------------------------------------------------------------|------------|------------|------------------------------------------------------|------------------------------------|---------------------------------------------------------------------------|-----------------------------------|-----------------------------------|--------------------------------------------|---------------------------------------|
| HCMV<br>Protein         | Gene Bank or<br>Swiss Prot ID | Reason for<br>exclusion from<br>Revised Set | HCMV<br>Protein        | HCMV<br>Protein                                                 | CD8<br>(#) | CD4<br>(#) | HCMV<br>Protein                                      | Sequence<br>identity<br>(median %) | HCMV<br>Protein                                                           | Peptides with<br>IC50≤50nM<br>(#) | Restricting<br>HLA alleles<br>(#) | HCMV<br>Protein                            | Immunogenicity<br>score<br>(median) † |
| TRL13                   | CAA35461                      | COMB                                        | TRL13/14               | TRL13/14                                                        | 9          | 5          |                                                      |                                    |                                                                           |                                   |                                   |                                            |                                       |
| TRL14                   | CAA35433                      |                                             |                        |                                                                 |            |            |                                                      |                                    |                                                                           |                                   |                                   |                                            |                                       |
| TRS 1                   | CAA35269                      |                                             | NFL                    |                                                                 |            |            |                                                      |                                    |                                                                           |                                   |                                   |                                            |                                       |
| UL 1                    | CAA35434                      | ASO                                         | UL 1                   | UL 1                                                            | 0          | 0          | UL1                                                  | 76.2                               |                                                                           |                                   |                                   |                                            |                                       |
| UL 2                    | CAA35435                      |                                             | UL 2                   | UL 2                                                            | 1          | 1          | UL2                                                  | 93.3                               |                                                                           |                                   |                                   |                                            |                                       |
| UL 3                    | CAA35436                      |                                             |                        |                                                                 |            |            |                                                      |                                    |                                                                           |                                   |                                   |                                            |                                       |
| UL 4                    | CAA35437                      |                                             | UL 4                   | UL 4                                                            | 1          | 4          | UL4                                                  | 88.7                               |                                                                           |                                   |                                   |                                            |                                       |
| UL 5                    | CAA35438                      |                                             | UL 5                   | UL 5                                                            | 0          | 0          | UL5                                                  | 97                                 |                                                                           |                                   |                                   |                                            |                                       |
| UL 6                    | CAA35439                      | NFL                                         | UL 6                   | UL 6                                                            | 0          | 0          | UL6                                                  | 85.2                               |                                                                           |                                   |                                   |                                            |                                       |
| UL 7                    | CAA35440                      |                                             | UL 7                   | UL 7                                                            | 1          | 0          | UL7                                                  | 87.8                               |                                                                           |                                   |                                   |                                            |                                       |
| UL 8                    | CAA35441                      |                                             |                        |                                                                 |            |            |                                                      |                                    |                                                                           |                                   |                                   |                                            |                                       |
| UL 9                    | CAA35442                      |                                             | UL 9                   | UL 9                                                            | 0          | 1          | UL9                                                  | 58.6                               |                                                                           |                                   |                                   |                                            |                                       |
| UL 10                   | CAA35443                      |                                             | UL 10                  | UL 10                                                           | 0          | 0          | UL10                                                 | 95.3                               |                                                                           |                                   |                                   |                                            |                                       |
| UL 11                   | CAA35444                      | ASO                                         | UL 11                  | UL 11                                                           | 0          | 1          | UL11                                                 | 71.7                               |                                                                           |                                   |                                   |                                            |                                       |
| UL 12                   | CAA35446                      |                                             |                        |                                                                 |            |            |                                                      |                                    |                                                                           |                                   |                                   |                                            |                                       |
| UL 13                   | CAA35445                      |                                             | UL 13                  | UL 13                                                           | 0          | 3          | UL 13                                                | 98.1                               | UL 13                                                                     | 149                               | 20                                |                                            |                                       |
| UL 14                   | CAA35447                      |                                             | UL 14                  | UL 14                                                           | 1          | 0          | UL 14                                                | 99.1                               | UL 14                                                                     | 70                                | 18                                |                                            |                                       |
| UL 15                   | CAA35415                      |                                             |                        |                                                                 |            |            |                                                      |                                    |                                                                           |                                   |                                   |                                            |                                       |
| UL 16                   | CAA35448                      | ASO                                         | UL 16                  | UL 16                                                           | 1          | 4          | UL 16                                                | 98.3                               | UL 16                                                                     | 81                                | 18                                |                                            |                                       |
| UL 17                   | CAA35416                      |                                             | UL 17                  | UL17                                                            | 0          | 5          |                                                      |                                    |                                                                           |                                   |                                   |                                            |                                       |
| UL 18                   | CAA35417                      |                                             | UL 18                  | UL 18                                                           | 1          | 4          | UL 18                                                | 97.4                               |                                                                           |                                   |                                   |                                            |                                       |
| UL 19                   | CAA35418                      |                                             | UL 19                  | UL 19                                                           | 0          | 0          | UL 19                                                | 98                                 | UL 19                                                                     | 50                                | 15                                |                                            |                                       |
| UL 20                   | CAA35419                      |                                             | UL 20                  | UL 20                                                           | 0          | 3          | UL 20                                                | 86.5                               |                                                                           |                                   |                                   |                                            |                                       |
| UL 21                   | CAA35420                      | ASO                                         |                        |                                                                 |            |            |                                                      |                                    |                                                                           |                                   |                                   |                                            |                                       |
| UL 21.5                 | P16845                        |                                             | UL 21.5                | UL 21.5                                                         | 1          | 2          | UL21.5                                               | 87.5                               |                                                                           |                                   |                                   |                                            |                                       |
| UL 22                   | CAA35421                      |                                             |                        |                                                                 |            |            |                                                      |                                    |                                                                           |                                   |                                   |                                            |                                       |
| UL 23                   | CAA35422                      | ASO                                         | UL 23                  | UL 23                                                           | 3          | 1          | UL 23                                                | 98.9                               | UL 23                                                                     | 116                               | 20                                |                                            |                                       |
| UL 24                   | CAA35423                      |                                             | UL 24                  | UL 24                                                           | 1          | 5          |                                                      |                                    |                                                                           |                                   |                                   |                                            |                                       |
| UL 25                   | CAA35424                      |                                             | UL 25                  | UL 25                                                           | 1          | 9          |                                                      |                                    |                                                                           |                                   |                                   |                                            |                                       |

| Original Set<br>n = 214 |                               |                                             | Revised Set<br>n = 148 | Test Set<br>n = 109<br><br>≤ 4 CD4 AND ≤ 4 CD8 T<br>cell responders |            |            | Identity Set<br>n = 61<br><br>≥ 98% sequence<br>identifiy |                                    | Affinity-HLA Set<br>n = 35<br><br>High affiity binding to<br>most HLA alleles |                                   |                                   | Final Set<br>n = 24<br><br>High immunogenicity |                                       |       |      |       |     |    |       |       |
|-------------------------|-------------------------------|---------------------------------------------|------------------------|---------------------------------------------------------------------|------------|------------|-----------------------------------------------------------|------------------------------------|-------------------------------------------------------------------------------|-----------------------------------|-----------------------------------|------------------------------------------------|---------------------------------------|-------|------|-------|-----|----|-------|-------|
| HCMV<br>Protein         | Gene Bank or<br>Swiss Prot ID | Reason for<br>exclusion from<br>Revised Set | HCMV<br>Protein        | HCMV<br>Protein                                                     | CD8<br>(#) | CD4<br>(#) | HCMV<br>Protein                                           | Sequence<br>identity<br>(median %) | HCMV<br>Protein                                                               | Peptides with<br>IC50≤50nM<br>(#) | Restricting<br>HLA alleles<br>(#) | HCMV<br>Protein                                | Immunogenicity<br>score<br>(median) † |       |      |       |     |    |       |       |
| UL 26                   | CAA35425                      | COMB                                        | UL 26                  | UL 26                                                               | 2          | 0          | UL 26                                                     | 98.9                               | UL 26                                                                         | 44                                | 20                                | UL 27                                          | 0.086                                 |       |      |       |     |    |       |       |
| UL 27                   | CAA35426                      |                                             | UL 27                  | UL 27                                                               | 0          | 1          | UL 27                                                     | 98.7                               | UL 27                                                                         | 186                               | 23                                |                                                |                                       |       |      |       |     |    |       |       |
| UL 28                   | CAA35427                      |                                             | UL 28/UL29             | UL 28/UL29                                                          | 10         | 4          |                                                           |                                    |                                                                               |                                   |                                   | UL35                                           |                                       |       |      |       |     |    |       |       |
| UL 29                   | CAA35428                      |                                             |                        |                                                                     |            |            |                                                           |                                    |                                                                               |                                   |                                   |                                                |                                       |       |      |       |     |    |       |       |
| UL 30                   | CAA35429                      |                                             | UL 30                  | UL 30                                                               | 0          | 0          | UL30                                                      | 96.7                               | UL31                                                                          | 201                               | 20                                |                                                |                                       |       |      |       |     |    |       |       |
| UL 31                   | CAA35430                      |                                             | UL 31                  | UL 31                                                               | 0          | 1          | UL 31                                                     | 99.2                               |                                                                               |                                   |                                   |                                                |                                       |       |      |       |     |    |       |       |
| UL 32                   | CAA35431                      |                                             | UL 32                  | UL 32                                                               | 9          | 13         |                                                           |                                    |                                                                               |                                   |                                   |                                                |                                       |       |      |       |     |    |       |       |
| UL 33                   | CAA35432*                     |                                             | UL 33                  | UL 33                                                               | 6          | 1          |                                                           |                                    |                                                                               |                                   |                                   |                                                |                                       |       |      |       |     |    |       |       |
| UL 34                   | CAA35393                      |                                             | UL 34                  | UL 34                                                               | 5          | 0          |                                                           |                                    |                                                                               |                                   |                                   |                                                |                                       |       |      |       |     |    |       |       |
| UL 35                   | CAA35394                      |                                             | UL 35                  | UL 35                                                               | 0          | 0          | UL 35                                                     | 99.4                               | UL 35                                                                         | 158                               | 23                                |                                                |                                       |       |      |       |     |    |       |       |
| UL 36                   | CAA35395                      | UL 36                                       | UL 36                  | 4                                                                   | 15         |            |                                                           |                                    |                                                                               |                                   |                                   |                                                |                                       |       |      |       |     |    |       |       |
| UL 37                   | CAA35396                      | UL 37                                       | UL 37                  | 4                                                                   | 4          |            |                                                           |                                    |                                                                               |                                   |                                   |                                                |                                       |       |      |       |     |    |       |       |
| UL 38                   | CAA35397                      | UL 38                                       | UL 38                  | 3                                                                   | 1          | UL 38      | 98.6                                                      | UL 38                              | 118                                                                           | 20                                |                                   |                                                |                                       |       |      |       |     |    |       |       |
| UL 39                   | CAA35398                      |                                             |                        |                                                                     |            |            |                                                           |                                    |                                                                               |                                   |                                   |                                                |                                       |       |      |       |     |    |       |       |
| UL 40                   | CAA35399                      | UL 40                                       | UL 40                  | 3                                                                   | 1          | UL40       | 96.4                                                      |                                    |                                                                               |                                   |                                   |                                                |                                       |       |      |       |     |    |       |       |
| UL 41                   | CAA35400                      |                                             |                        |                                                                     |            |            |                                                           |                                    |                                                                               |                                   |                                   |                                                |                                       |       |      |       |     |    |       |       |
| UL 41a                  | CAA74073                      | ASO                                         | UL 41a                 | UL 41a                                                              | 0          | 0          | UL 41a                                                    | 98.7                               | UL 41a                                                                        | 30                                | 11                                |                                                |                                       |       |      |       |     |    |       |       |
| UL 42                   | CAA74074                      |                                             | UL 42                  | UL 42                                                               | 0          | 0          | UL42                                                      | 94.7                               |                                                                               |                                   |                                   |                                                |                                       |       |      |       |     |    |       |       |
| UL 43                   | CAA74075                      |                                             | UL 43                  | UL 43                                                               | 2          | 4          | UL 43                                                     | 99.1                               | UL 43                                                                         | 151                               | 21                                | UL 43                                          | 0.041                                 |       |      |       |     |    |       |       |
| UL 44                   | CAA35403                      |                                             | UL 44                  | UL 44                                                               | 6          | 6          |                                                           |                                    |                                                                               |                                   |                                   |                                                |                                       |       |      |       |     |    |       |       |
| UL 45                   | CAA35404                      |                                             | UL 45                  | UL 45                                                               | 4          | 3          |                                                           |                                    |                                                                               |                                   |                                   |                                                |                                       | UL 45 | 99.5 | UL 45 | 319 | 26 | UL 45 | 0.077 |
| UL 46                   | CAA35405                      |                                             | UL 46                  | UL 46                                                               | 0          | 2          | UL 46                                                     | 99.7                               | UL 46                                                                         | 121                               | 22                                | UL46                                           | 0.020†                                |       |      |       |     |    |       |       |
| UL 47                   | CAA35406                      |                                             | UL 47                  | UL 47                                                               | 2          | 1          | UL 47                                                     | 99.7                               | UL 47                                                                         | 332                               | 26                                | UL 47                                          | 0.074                                 |       |      |       |     |    |       |       |
| UL 48                   | CAA35407                      |                                             | UL 48                  | UL 48                                                               | 21         | 15         | UL48                                                      | 99.3                               | UL48                                                                          | 542                               | 26                                | UL48                                           | 0.081                                 |       |      |       |     |    |       |       |
| UL 48.5                 | YP_081507.1                   |                                             | UL 48.5                | UL 48.5                                                             | 3          | 2          | UL 48.5                                                   | 98.7                               | UL 48.5                                                                       | 29                                | 11                                |                                                |                                       |       |      |       |     |    |       |       |
| UL 49                   | CAA35408                      | UL 49                                       | UL 49                  | 6                                                                   | 4          |            |                                                           |                                    |                                                                               |                                   |                                   |                                                |                                       |       |      |       |     |    |       |       |
| UL 50                   | CAA35409                      | UL 50                                       | UL 50                  | 2                                                                   | 2          | UL 50      | 99.3                                                      | UL 50                              | 66                                                                            | 19                                |                                   |                                                |                                       |       |      |       |     |    |       |       |
| UL 51                   | CAA35410                      | UL 51                                       | UL 51                  | 0                                                                   | 3          | UL 51      | 99.5                                                      |                                    |                                                                               |                                   |                                   |                                                |                                       |       |      |       |     |    |       |       |
| UL 52                   | CAA35411                      | UL 52                                       | UL 52                  | 0                                                                   | 9          |            |                                                           |                                    |                                                                               |                                   |                                   |                                                |                                       |       |      |       |     |    |       |       |

[illegible]

[illegible]

| Original Set<br>n = 214 |                               |                                             | Revised Set<br>n = 148 | Test Set<br>n = 109<br><br>≤ 4 CD4 AND ≤ 4 CD8 T<br>cell responders |            |            | Identity Set<br>n = 61<br><br>≥ 98% sequence<br>identifiy |                                    | Affinity-HLA Set<br>n = 35<br><br>High affiity binding to<br>most HLA alleles |                                   |                                   | Final Set<br>n = 24<br><br>High immunogenicity |                                       |
|-------------------------|-------------------------------|---------------------------------------------|------------------------|---------------------------------------------------------------------|------------|------------|-----------------------------------------------------------|------------------------------------|-------------------------------------------------------------------------------|-----------------------------------|-----------------------------------|------------------------------------------------|---------------------------------------|
| HCMV<br>Protein         | Gene Bank or<br>Swiss Prot ID | Reason for<br>exclusion from<br>Revised Set | HCMV<br>Protein        | HCMV<br>Protein                                                     | CD8<br>(#) | CD4<br>(#) | HCMV<br>Protein                                           | Sequence<br>identity<br>(median %) | HCMV<br>Protein                                                               | Peptides with<br>IC50≤50nM<br>(#) | Restricting<br>HLA alleles<br>(#) | HCMV<br>Protein                                | Immunogenicity<br>score<br>(median) † |
| UL110                   | CAA35348                      | ASO                                         |                        |                                                                     |            |            |                                                           |                                    |                                                                               |                                   |                                   |                                                |                                       |
| UL111                   | CAA35349                      | ASO                                         |                        |                                                                     |            |            |                                                           |                                    |                                                                               |                                   |                                   |                                                |                                       |
| UL111A                  | CAA35350                      | NFL                                         |                        |                                                                     |            |            |                                                           |                                    |                                                                               |                                   |                                   |                                                |                                       |
| UL112                   | P16768                        | NFL                                         |                        |                                                                     |            |            |                                                           |                                    |                                                                               |                                   |                                   |                                                |                                       |
| UL113                   | CAA35315                      |                                             | UL113                  | UL113                                                               | 2          | 14         |                                                           |                                    |                                                                               |                                   |                                   |                                                |                                       |
| UL114                   | CAA35316                      |                                             | UL114                  | UL114                                                               | 3          | 3          | UL114                                                     | 99.6                               | UL114                                                                         | 79                                | 17                                |                                                |                                       |
| UL115                   | P16832                        |                                             | UL115                  | UL115                                                               | 0          | 3          | UL115                                                     | 98.2                               | UL115                                                                         | 77                                | 19                                |                                                |                                       |
| UL116                   | CAA35318                      |                                             | UL116                  | UL116                                                               | 4          | 1          | UL116                                                     | 95.2                               |                                                                               |                                   |                                   |                                                |                                       |
| UL117                   | CAA35319                      |                                             | UL117                  | UL117                                                               | 1          | 0          | UL117                                                     | 99.3                               | UL117                                                                         | 121                               | 22                                | UL117                                          | 0.047                                 |
| UL118                   | CAA35320                      | COMB                                        | UL118/119              | UL118/119                                                           | 0          | 1          | UL118/119                                                 | 96.8                               |                                                                               |                                   |                                   |                                                |                                       |
| UL119                   | CAA35321                      |                                             |                        |                                                                     |            |            |                                                           |                                    |                                                                               |                                   |                                   |                                                |                                       |
| UL120                   | CAA35322                      |                                             | UL120                  | UL120                                                               | 2          | 1          | UL120                                                     | 84.6                               |                                                                               |                                   |                                   |                                                |                                       |
| UL121                   | CAA35323                      |                                             | UL121                  | UL121                                                               | 0          | 0          | UL121                                                     | 95.0                               |                                                                               |                                   |                                   |                                                |                                       |
| UL122                   | P19893                        |                                             | UL122                  | UL122                                                               | 12         | 15         |                                                           |                                    |                                                                               |                                   |                                   |                                                |                                       |
| UL123                   | CAA35325                      |                                             | UL123                  | UL123                                                               | 18         | 12         | UL123                                                     | 97.2                               | UL123                                                                         | 115                               | 21                                | UL123                                          | -0.108†                               |
| UL124                   | CAA35326                      |                                             | UL124                  | UL124                                                               | 1          | 0          | UL124                                                     | 96.1                               |                                                                               |                                   |                                   |                                                |                                       |
| UL125                   | CAA35327                      | ASO                                         |                        |                                                                     |            |            |                                                           |                                    |                                                                               |                                   |                                   |                                                |                                       |
| UL126                   | CAA35328                      | ASO                                         |                        |                                                                     |            |            |                                                           |                                    |                                                                               |                                   |                                   |                                                |                                       |
| UL127                   | CAA35329                      | ASO                                         |                        |                                                                     |            |            |                                                           |                                    |                                                                               |                                   |                                   |                                                |                                       |
| UL128                   | CAA35330                      | NFL                                         |                        |                                                                     |            |            |                                                           |                                    |                                                                               |                                   |                                   |                                                |                                       |
| UL129                   | CAA35331                      | ASO                                         |                        |                                                                     |            |            |                                                           |                                    |                                                                               |                                   |                                   |                                                |                                       |
| UL130                   | CAA35332                      |                                             | UL130                  | UL130                                                               | 1          | 1          | UL130                                                     | 97.7                               |                                                                               |                                   |                                   |                                                |                                       |
| UL131                   | CAA35294                      | ASO                                         |                        |                                                                     |            |            |                                                           |                                    |                                                                               |                                   |                                   |                                                |                                       |
| UL132                   | CAA35295                      |                                             | UL132                  | UL132                                                               | 3          | 0          | UL132                                                     | 93.3                               |                                                                               |                                   |                                   |                                                |                                       |
| UL133ToI                | AAA85872.1                    |                                             | UL133ToI               | UL133ToI                                                            | 0          | 0          | UL133ToI                                                  | 96.1                               |                                                                               |                                   |                                   |                                                |                                       |
| UL134ToI                | AAA85873.1                    |                                             | UL134ToI               | UL134ToI                                                            | 0          | 1          | UL134ToI                                                  | 94.6                               |                                                                               |                                   |                                   |                                                |                                       |
| UL135ToI                | AAA85874.1                    |                                             | UL135ToI               | UL135ToI                                                            | 1          | 2          | UL135ToI                                                  | 97.9                               |                                                                               |                                   |                                   |                                                |                                       |
| UL136ToI                | AAA85875.1                    |                                             | UL136ToI               | UL136ToI                                                            | 1          | 0          | UL136ToI                                                  | 97.9                               |                                                                               |                                   |                                   |                                                |                                       |
| UL137ToI                | AAA85876.1                    |                                             | UL137ToI               | UL137ToI                                                            | 0          | 0          | UL137ToI                                                  | 94.8                               |                                                                               |                                   |                                   |                                                |                                       |

| Original Set<br>n = 214 |                               |                                             | Revised Set<br>n = 148 | Test Set<br>n = 109<br><br>≤ 4 CD4 AND ≤ 4 CD8 T<br>cell responders |            |            | Identity Set<br>n = 61<br><br>≥ 98% sequence<br>identifiy |                                    | Affinity-HLA Set<br>n = 35<br><br>High affiity binding to<br>most HLA alleles |                                   |                                   | Final Set<br>n = 24<br><br>High immunogenicity |                                       |          |     |    |          |       |
|-------------------------|-------------------------------|---------------------------------------------|------------------------|---------------------------------------------------------------------|------------|------------|-----------------------------------------------------------|------------------------------------|-------------------------------------------------------------------------------|-----------------------------------|-----------------------------------|------------------------------------------------|---------------------------------------|----------|-----|----|----------|-------|
| HCMV<br>Protein         | Gene Bank or<br>Swiss Prot ID | Reason for<br>exclusion from<br>Revised Set | HCMV<br>Protein        | HCMV<br>Protein                                                     | CD8<br>(#) | CD4<br>(#) | HCMV<br>Protein                                           | Sequence<br>identity<br>(median %) | HCMV<br>Protein                                                               | Peptides with<br>IC50≤50nM<br>(#) | Restricting<br>HLA alleles<br>(#) | HCMV<br>Protein                                | Immunogenicity<br>score<br>(median) † |          |     |    |          |       |
| UL138ToI                | AAA85877.1                    | NFL                                         | UL138ToI               | UL138ToI                                                            | 1          | 1          | UL138ToI                                                  | 98.2                               | UL138ToI                                                                      | 44                                | 19                                |                                                |                                       |          |     |    |          |       |
| UL139ToI                | AAA85878.1                    |                                             | UL139ToI               | UL139ToI                                                            | 0          | 0          | UL139ToI                                                  | 83.0                               |                                                                               |                                   |                                   |                                                |                                       |          |     |    |          |       |
| UL140ToI                | AAA85879.1                    |                                             |                        |                                                                     |            |            |                                                           |                                    |                                                                               |                                   |                                   |                                                |                                       |          |     |    |          |       |
| UL141ToI                | AAA85880.1                    |                                             | UL141ToI               | UL141ToI                                                            | 1          | 9          |                                                           |                                    |                                                                               |                                   |                                   |                                                |                                       |          |     |    |          |       |
| UL142ToI                | AAA85881.1                    |                                             | UL142ToI               | UL142ToI                                                            | 0          | 2          | UL142ToI                                                  | 91.8                               |                                                                               |                                   |                                   |                                                |                                       |          |     |    |          |       |
| UL143ToI                | AAA85882.1                    | NFL                                         |                        |                                                                     |            |            |                                                           |                                    |                                                                               |                                   |                                   |                                                |                                       |          |     |    |          |       |
| UL144ToI                | AAA85883.1                    | UL144ToI                                    | UL144ToI               | 0                                                                   | 4          | UL144ToI   | 83.0                                                      |                                    |                                                                               |                                   |                                   |                                                |                                       |          |     |    |          |       |
| UL145ToI                | AAA85884.1                    | NFL                                         |                        |                                                                     |            |            |                                                           |                                    |                                                                               |                                   |                                   |                                                |                                       |          |     |    |          |       |
| UL146ToI                | AAA85885.1                    | UL146ToI                                    | UL146ToI               | 1                                                                   | 5          |            |                                                           |                                    |                                                                               |                                   |                                   |                                                |                                       |          |     |    |          |       |
| UL147ToI                | AAA85886.1                    | UL147ToI                                    | UL147ToI               | 0                                                                   | 3          | UL147ToI   | 89.9                                                      |                                    |                                                                               |                                   |                                   |                                                |                                       |          |     |    |          |       |
| UL148ToI                | AAA85887.1                    | UL148ToI                                    | UL148ToI               | 0                                                                   | 3          | UL148ToI   | 98.7                                                      |                                    |                                                                               |                                   |                                   |                                                |                                       | UL148ToI | 122 | 22 | UL148ToI | 0.092 |
| UL149 ToI               | AAA85890.1                    | UL149 ToI                                   | UL149 ToI              | 0                                                                   | 0          | UL149      | 91.0                                                      |                                    |                                                                               |                                   |                                   |                                                |                                       |          |     |    |          |       |
| UL150 ToI               | AAA85891.1                    | NFL                                         |                        |                                                                     |            |            |                                                           |                                    |                                                                               |                                   |                                   |                                                |                                       |          |     |    |          |       |
| UL151 Tow               | AAA85892.1                    | ASO                                         |                        |                                                                     |            |            |                                                           |                                    |                                                                               |                                   |                                   |                                                |                                       |          |     |    |          |       |
| UL152 Tow               | AAA85894.1                    | DUPL (UL146)                                |                        |                                                                     |            |            |                                                           |                                    |                                                                               |                                   |                                   |                                                |                                       |          |     |    |          |       |
| UL153 Tow               | AAA85895.1                    | DUPL (TRL13/14)                             |                        |                                                                     |            |            |                                                           |                                    |                                                                               |                                   |                                   |                                                |                                       |          |     |    |          |       |
| UL154 Tow               | AAA85896.1                    | DUPL (TRL12)                                |                        |                                                                     |            |            |                                                           |                                    |                                                                               |                                   |                                   |                                                |                                       |          |     |    |          |       |
| US 1                    | CAA35312                      |                                             | US 1                   | US 1                                                                | 5          | 2          |                                                           |                                    |                                                                               |                                   |                                   |                                                |                                       |          |     |    |          |       |
| US 2                    | CAA35313                      |                                             | US 2                   | US 2                                                                | 2          | 2          | US 2                                                      | 99.5                               | US2                                                                           | 88                                | 22                                | US2                                            | 0.092                                 |          |     |    |          |       |
| US 3                    | CAA35314                      |                                             | US 3                   | US 3                                                                | 8          | 5          |                                                           |                                    |                                                                               |                                   |                                   |                                                |                                       |          |     |    |          |       |
| US 4                    | CAA35271                      | ASO                                         |                        |                                                                     |            |            |                                                           |                                    |                                                                               |                                   |                                   |                                                |                                       |          |     |    |          |       |
| US 5                    | CAA35272                      | ASO                                         |                        |                                                                     |            |            |                                                           |                                    |                                                                               |                                   |                                   |                                                |                                       |          |     |    |          |       |
| US 6                    | CAA35273                      |                                             | US 6                   | US 6                                                                | 0          | 2          | US6                                                       | 95.6                               |                                                                               |                                   |                                   |                                                |                                       |          |     |    |          |       |
| US 7                    | CAA35274                      |                                             | US 7                   | US 7                                                                | 0          | 1          | US7                                                       | 95.1                               |                                                                               |                                   |                                   |                                                |                                       |          |     |    |          |       |
| US 8                    | CAA35275                      |                                             | US 8                   | US 8                                                                | 1          | 2          | US8                                                       | 97.8                               |                                                                               |                                   |                                   |                                                |                                       |          |     |    |          |       |
| US 9                    | CAA35276                      |                                             | US 9                   | US 9                                                                | 1          | 1          | US 9                                                      | 98.8                               |                                                                               |                                   |                                   |                                                |                                       |          |     |    |          |       |
| US10                    | CAA35277                      |                                             | US10                   | US10                                                                | 2          | 3          | US10                                                      | 98.4                               |                                                                               |                                   |                                   |                                                |                                       |          |     |    |          |       |
| US11                    | CAA35278                      |                                             | US11                   | US11                                                                | 1          | 0          | US11                                                      | 98.6                               |                                                                               |                                   |                                   |                                                |                                       | US11     | 105 | 23 | US11     | 0.087 |
| US12                    | CAA35279                      |                                             | US12                   | US12                                                                | 3          | 3          | US12                                                      | 98.9                               |                                                                               |                                   |                                   |                                                |                                       | US12     | 162 | 21 | US12     | 0.091 |

[illegible]



**Table S2.** CD4 or CD8 T cell reactivities to Revised Set HCMV proteins. Panels are sorted by A) participant number or B) number of proteins recognized by total T cells (CD4+CD8). Mean 25 and median 21 proteins were recognized. P, participants.

**A)**

| P    | CD4<br><1% | CD4<br>>1% | CD8<br><1% | CD8<br>>1% | Total<br>CD4 | Total<br>CD8 | Total<br>CD4+CD8 |
|------|------------|------------|------------|------------|--------------|--------------|------------------|
| P 1  | 5          | 0          | 16         | 8          | 5            | 24           | 29               |
| P 2  | 8          | 2          | 2          | 1          | 10           | 3            | 13               |
| P 3  | 11         | 0          | 2          | 0          | 11           | 2            | 13               |
| P 4  | 25         | 3          | 15         | 2          | 28           | 17           | 45               |
| P 5  | 7          | 0          | 1          | 0          | 7            | 1            | 8                |
| P 6  | 25         | 4          | 8          | 4          | 29           | 12           | 41               |
| P 7  | 6          | 2          | 8          | 6          | 8            | 14           | 22               |
| P 8  | 23         | 3          | 5          | 1          | 26           | 6            | 32               |
| P 9  | 20         | 9          | 12         | 6          | 29           | 18           | 47               |
| P 10 | 15         | 3          | 4          | 0          | 18           | 4            | 22               |
| P 11 | 10         | 0          | 2          | 3          | 10           | 5            | 15               |
| P 12 | 2          | 2          | 4          | 3          | 4            | 7            | 11               |
| P 13 | 9          | 0          | 8          | 3          | 9            | 11           | 20               |
| P 14 | 6          | 1          | 7          | 4          | 7            | 11           | 18               |
| P 15 | 14         | 3          | 3          | 1          | 17           | 4            | 21               |
| P 16 | 2          | 0          | 3          | 3          | 2            | 6            | 8                |
| P 17 | 13         | 2          | 8          | 0          | 15           | 8            | 23               |
| P 18 | 16         | 3          | 10         | 3          | 19           | 13           | 32               |
| P 19 | 31         | 4          | 19         | 6          | 35           | 25           | 60               |
| P 20 | 5          | 0          | 6          | 2          | 5            | 8            | 13               |
| P 21 | 11         | 7          | 15         | 5          | 18           | 20           | 38               |
| P 22 | 9          | 5          | 3          | 3          | 14           | 6            | 20               |
| P 23 | 12         | 4          | 6          | 4          | 16           | 10           | 26               |
| P 24 | 9          | 3          | 4          | 0          | 12           | 4            | 16               |
| P 25 | 25         | 2          | 16         | 1          | 27           | 17           | 44               |
| P 26 | 5          | 0          | 2          | 0          | 5            | 2            | 7                |
| P 27 | 6          | 0          | 4          | 0          | 6            | 4            | 10               |
| P 28 | 29         | 2          | 23         | 0          | 31           | 23           | 54               |
| P 29 | 0          | 2          | 20         | 7          | 2            | 27           | 29               |
| P 30 | 1          | 6          | 6          | 4          | 7            | 10           | 17               |
| P 31 | 0          | 3          | 5          | 1          | 3            | 6            | 9                |
| P 32 | 3          | 1          | 0          | 2          | 4            | 2            | 6                |
| P 33 | 16         | 4          | 26         | 4          | 20           | 30           | 50               |

**B)**

| P    | CD4<br><1% | CD4<br>>1% | CD8<br><1% | CD8<br>>1% | Total<br>CD4 | Total<br>CD8 | Total<br>CD4+CD8 |
|------|------------|------------|------------|------------|--------------|--------------|------------------|
| P 32 | 3          | 1          | 0          | 2          | 4            | 2            | 6                |
| P 26 | 5          | 0          | 2          | 0          | 5            | 2            | 7                |
| P 5  | 7          | 0          | 1          | 0          | 7            | 1            | 8                |
| P 16 | 2          | 0          | 3          | 3          | 2            | 6            | 8                |
| P 31 | 0          | 3          | 5          | 1          | 3            | 6            | 9                |
| P 27 | 6          | 0          | 4          | 0          | 6            | 4            | 10               |
| P 12 | 2          | 2          | 4          | 3          | 4            | 7            | 11               |
| P 2  | 8          | 2          | 2          | 1          | 10           | 3            | 13               |
| P 3  | 11         | 0          | 2          | 0          | 11           | 2            | 13               |
| P 20 | 5          | 0          | 6          | 2          | 5            | 8            | 13               |
| P 11 | 10         | 0          | 2          | 3          | 10           | 5            | 15               |
| P 24 | 9          | 3          | 4          | 0          | 12           | 4            | 16               |
| P 30 | 1          | 6          | 6          | 4          | 7            | 10           | 17               |
| P 14 | 6          | 1          | 7          | 4          | 7            | 11           | 18               |
| P 13 | 9          | 0          | 8          | 3          | 9            | 11           | 20               |
| P 22 | 9          | 5          | 3          | 3          | 14           | 6            | 20               |
| P 15 | 14         | 3          | 3          | 1          | 17           | 4            | 21               |
| P 7  | 6          | 2          | 8          | 6          | 8            | 14           | 22               |
| P 10 | 15         | 3          | 4          | 0          | 18           | 4            | 22               |
| P 17 | 13         | 2          | 8          | 0          | 15           | 8            | 23               |
| P 23 | 12         | 4          | 6          | 4          | 16           | 10           | 26               |
| P 1  | 5          | 0          | 16         | 8          | 5            | 24           | 29               |
| P 29 | 0          | 2          | 20         | 7          | 2            | 27           | 29               |
| P 8  | 23         | 3          | 5          | 1          | 26           | 6            | 32               |
| P 18 | 16         | 3          | 10         | 3          | 19           | 13           | 32               |
| P 21 | 11         | 7          | 15         | 5          | 18           | 20           | 38               |
| P 6  | 25         | 4          | 8          | 4          | 29           | 12           | 41               |
| P 25 | 25         | 2          | 16         | 1          | 27           | 17           | 44               |
| P 4  | 25         | 3          | 15         | 2          | 28           | 17           | 45               |
| P 9  | 20         | 9          | 12         | 6          | 29           | 18           | 47               |
| P 33 | 16         | 4          | 26         | 4          | 20           | 30           | 50               |
| P 28 | 29         | 2          | 23         | 0          | 31           | 23           | 54               |
| P 19 | 31         | 4          | 19         | 6          | 35           | 25           | 60               |

**Table S3.** BLASTP summary of Test Set proteins. Shaded cells indicate proteins excluded from the Test Set in the next step of the algorithm.

(A) UL region proteins; (B) US region proteins

A)

|                    | TRL1     | IRS1     | TRL12    | TRL6     | TRL10    | TRL11    | TRL13/14  | UL1      | UL2      | UL4       |
|--------------------|----------|----------|----------|----------|----------|----------|-----------|----------|----------|-----------|
| <b>Access #</b>    | CAA35449 | CAA35311 | CAA35460 | CAA35454 | CAA35458 | CAA35459 | CAA35461  | CAA35434 | CAA35435 | CAA35436  |
| <b>Length (aa)</b> | 311      | 846      | 416      | 111      | 171      | 234      | 147 - 302 | 224      | 60       | 149 - 152 |
| <b>Min</b>         | 76.53%   | 91.35%   | 33.72%   | 97.30%   | 90.06%   | 94.04%   | 41.46%    | 55.36%   | 90.00%   | 79.19%    |
| <b>Max</b>         | 99.68%   | 99.76%   | 99.76%   | 100.00%  | 99.42%   | 99.57%   | 99.67%    | 99.55%   | 98.33%   | 100.00%   |
| <b>Mean</b>        | 91.92%   | 95.13%   | 48.95%   | 98.57%   | 94.80%   | 96.40%   | 64.72%    | 82.54%   | 94.17%   | 90.89%    |
| <b>Median</b>      | 92.28%   | 95.37%   | 44.81%   | 98.20%   | 94.74%   | 96.58%   | 63.97%    | 76.21%   | 93.33%   | 88.67%    |

  

|                    | UL5      | UL6       | UL7       | UL9       | UL10      | UL11     | UL13     | UL14     | UL16     | UL17     |
|--------------------|----------|-----------|-----------|-----------|-----------|----------|----------|----------|----------|----------|
| <b>Access #</b>    | CAA35437 | CAA35438  | CAA35439  | CAA35441  | CAA35442  | CAA35443 | CAA35444 | CAA35447 | CAA35415 | CAA35448 |
| <b>Length (aa)</b> | 166      | 280 - 284 | 222 - 324 | 228 - 235 | 258 - 259 | 275      | 473      | 327      | 230      | 104      |
| <b>Min</b>         | 92.77%   | 77.42%    | 79.73%    | 50.21%    | 84.77%    | 65.94%   | 96.62%   | 98.17%   | 96.96%   | 97.12%   |
| <b>Max</b>         | 99.40%   | 100.00%   | 99.55%    | 99.12%    | 99.61%    | 99.64%   | 99.79%   | 99.69%   | 99.57%   | 99.04%   |
| <b>Mean</b>        | 96.08%   | 88.18%    | 87.43%    | 66.11%    | 93.26%    | 77.80%   | 98.23%   | 99.05%   | 98.34%   | 98.19%   |
| <b>Median</b>      | 96.99%   | 85.21%    | 87.84%    | 58.55%    | 95.29%    | 71.74%   | 98.10%   | 99.08%   | 98.26%   | 98.08%   |

  

|                    | UL18      | UL19     | UL20     | UL21.5   | UL23     | UL24      | UL25     | UL26     | UL27     | UL28/29  |
|--------------------|-----------|----------|----------|----------|----------|-----------|----------|----------|----------|----------|
| <b>Access #</b>    | CAA35416  | CAA35417 | CAA35418 | CAA35419 | CAA35420 | P16845    | CAA35424 | CAA35425 | CAA35426 | CAA35427 |
| <b>Length (aa)</b> | 363 - 368 | 98       | 340      | 104-105  | 284      | 300 - 358 | 656      | 118      | 608      | 700      |
| <b>Min</b>         | 94.29%    | 96.94%   | 74.78%   | 79.61%   | 97.89%   | 98.32%    | 99.09%   | 98.94%   | 97.86%   | 99.00%   |
| <b>Max</b>         | 99.73%    | 98.98%   | 100.00%  | 99.03%   | 100.00%  | 100.00%   | 99.85%   | 99.47%   | 100.00%  | 99.86%   |
| <b>Mean</b>        | 97.35%    | 98.16%   | 84.34%   | 88.87%   | 98.94%   | 99.35%    | 99.54%   | 99.04%   | 98.76%   | 99.51%   |
| <b>Median</b>      | 97.55%    | 97.96%   | 86.51%   | 87.50%   | 98.94%   | 99.44%    | 99.54%   | 98.94%   | 98.68%   | 99.57%   |

  

|                    | UL30     | UL31     | UL32     | UL33      | UL34     | UL35     | UL36     | UL37     | UL38     | UL40     |
|--------------------|----------|----------|----------|-----------|----------|----------|----------|----------|----------|----------|
| <b>Access #</b>    | CAA35429 | CAA35430 | CAA35431 | CAA35432* | CAA35393 | CAA35394 | CAA35395 | CAA35396 | CAA35397 | CAA35399 |
| <b>Length (aa)</b> | 121      | 595      | 1,048    | 412       | 407      | 640      | 476      | 487      | 331      | 221      |
| <b>Min</b>         | 94.21%   | 98.49%   | 98.00%   | 91.03%    | 98.77%   | 98.59%   | 91.99%   | 88.75%   | 96.68%   | 91.86%   |
| <b>Max</b>         | 99.17%   | 99.66%   | 99.81%   | 99.49%    | 99.75%   | 99.84%   | 99.79%   | 99.79%   | 99.70%   | 99.55%   |
| <b>Mean</b>        | 96.83%   | 99.15%   | 99.12%   | 94.95%    | 99.18%   | 99.35%   | 98.77%   | 91.78%   | 98.58%   | 96.57%   |
| <b>Median</b>      | 96.69%   | 99.16%   | 99.24%   | 93.59%    | 99.26%   | 99.38%   | 98.95%   | 91.17%   | 98.64%   | 96.38%   |

|                    | UL41A    | UL42     | UL43     | UL44     | UL45     | UL46     | UL47     | UL48     | UL48.5     | UL49     |
|--------------------|----------|----------|----------|----------|----------|----------|----------|----------|------------|----------|
| <b>Access #</b>    | CAA74073 | CAA74074 | CAA74075 | CAA35403 | CAA35404 | CAA35405 | CAA35406 | CAA35407 | YP_081507. | CAA35408 |
| <b>Length (aa)</b> | 78       | 78       | 423      | 433      | 906      | 290      | 982      | 2,241    | 75         | 570      |
| <b>Min</b>         | 98.72%   | 92.68%   | 98.35%   | 99.31%   | 98.68%   | 99.31%   | 99.19%   | 98.84%   | 97.33%     | 98.25%   |
| <b>Max</b>         | 98.72%   | 99.20%   | 99.76%   | 99.77%   | 99.89%   | 99.66%   | 100.00%  | 99.55%   | 98.67%     | 99.82%   |
| <b>Mean</b>        | 98.72%   | 94.97%   | 99.11%   | 99.59%   | 99.35%   | 99.63%   | 99.64%   | 99.28%   | 98.34%     | 98.95%   |
| <b>Median</b>      | 98.72%   | 94.74%   | 99.05%   | 99.77%   | 99.45%   | 99.66%   | 99.69%   | 99.29%   | 98.67%     | 98.95%   |

|                    | UL41A    | UL42     | UL43     | UL44     | UL45     | UL46     | UL47     | UL48     | UL48.5     | UL49     |
|--------------------|----------|----------|----------|----------|----------|----------|----------|----------|------------|----------|
| <b>Access #</b>    | CAA74073 | CAA74074 | CAA74075 | CAA35403 | CAA35404 | CAA35405 | CAA35406 | CAA35407 | YP_081507. | CAA35408 |
| <b>Length (aa)</b> | 78       | 78       | 423      | 433      | 906      | 290      | 982      | 2,241    | 75         | 570      |
| <b>Min</b>         | 98.72%   | 92.68%   | 98.35%   | 99.31%   | 98.68%   | 99.31%   | 99.19%   | 98.84%   | 97.33%     | 98.25%   |
| <b>Max</b>         | 98.72%   | 99.20%   | 99.76%   | 99.77%   | 99.89%   | 99.66%   | 100.00%  | 99.55%   | 98.67%     | 99.82%   |
| <b>Mean</b>        | 98.72%   | 94.97%   | 99.11%   | 99.59%   | 99.35%   | 99.63%   | 99.64%   | 99.28%   | 98.34%     | 98.95%   |
| <b>Median</b>      | 98.72%   | 94.74%   | 99.05%   | 99.77%   | 99.45%   | 99.66%   | 99.69%   | 99.29%   | 98.67%     | 98.95%   |

|                    | UL50     | UL51     | UL52     | UL53     | UL54     | UL55     | UL56     | UL57     | UL69      | UL70     |
|--------------------|----------|----------|----------|----------|----------|----------|----------|----------|-----------|----------|
| <b>Access #</b>    | CAA35409 | CAA35410 | CAA35411 | CAA35412 | CAA35413 | CAA35414 | CAA35371 | CAA35372 | CAA35384  | CAA35386 |
| <b>Length (aa)</b> | 397      | 361      | 668      | 375      | 1,242    | 906      | 850      | 1,235    | 744 - 748 | 946      |
| <b>Min</b>         | 98.25%   | 96.95%   | 98.20%   | 97.39%   | 99.11%   | 92.00%   | 98.59%   | 98.87%   | 98.39%    | 99.26%   |
| <b>Max</b>         | 99.75%   | 100.00%  | 99.85%   | 99.73%   | 100.00%  | 99.00%   | 99.88%   | 99.92%   | 99.73%    | 99.89%   |
| <b>Mean</b>        | 99.18%   | 99.46%   | 99.34%   | 99.27%   | 99.55%   | 95.85%   | 99.39%   | 99.75%   | 99.05%    | 99.60%   |
| <b>Median</b>      | 99.25%   | 99.45%   | 99.40%   | 99.47%   | 99.52%   | 95.00%   | 99.41%   | 99.76%   | 99.06%    | 99.58%   |

|                    | UL71     | UL72     | UL73     | UL74     | UL75     | UL76     | UL77     | UL78     | UL79     | UL80     |
|--------------------|----------|----------|----------|----------|----------|----------|----------|----------|----------|----------|
| <b>Access #</b>    | CAA35385 | CAA35387 | CAA35388 | CAA35389 | CAA35390 | CAA35391 | CAA35392 | CAA35351 | CAA35352 | CAA35353 |
| <b>Length (aa)</b> | 361      | 388      | 138      | 466      | 743      | 325      | 642      | 431      | 295      | 708      |
| <b>Min</b>         | 96.68%   | 97.94%   | 71.74%   | 73.19%   | 95.69%   | 96.62%   | 96.57%   | 96.77%   | 98.98%   | 97.46%   |
| <b>Max</b>         | 99.72%   | 99.74%   | 99.28%   | 99.79%   | 99.87%   | 99.69%   | 99.38%   | 100.00%  | 99.66%   | 99.86%   |
| <b>Mean</b>        | 99.19%   | 98.80%   | 83.37%   | 83.06%   | 97.61%   | 97.95%   | 97.88%   | 98.48%   | 99.49%   | 98.42%   |
| <b>Median</b>      | 99.17%   | 98.97%   | 78.99%   | 80.30%   | 96.77%   | 97.85%   | 97.82%   | 98.38%   | 99.66%   | 98.17%   |

|                    | UL82     | UL83     | UL84     | UL85     | UL86     | UL87     | UL88     | UL89     | UL91     | UL92     |
|--------------------|----------|----------|----------|----------|----------|----------|----------|----------|----------|----------|
| <b>Access #</b>    | CAA35356 | CAA35357 | CAA35358 | CAA35359 | CAA35360 | CAA35361 | CAA35362 | CAA35363 | CAA35365 | CAA35366 |
| <b>Length (aa)</b> | 559      | 561      | 586      | 306      | 1,370    | 941      | 429      | 674      | 111      | 201      |
| <b>Min</b>         | 98.57%   | 97.68%   | 97.10%   | 99.35%   | 99.05%   | 97.56%   | 90.68%   | 98.66%   | 95.50%   | 98.51%   |
| <b>Max</b>         | 99.82%   | 99.82%   | 99.83%   | 99.67%   | 99.93%   | 99.89%   | 100.00%  | 99.85%   | 99.10%   | 99.50%   |
| <b>Mean</b>        | 99.42%   | 99.49%   | 98.52%   | 99.63%   | 99.66%   | 99.27%   | 99.40%   | 99.37%   | 97.77%   | 99.22%   |

|               |        |        |        |        |        |        |        |        |        |        |
|---------------|--------|--------|--------|--------|--------|--------|--------|--------|--------|--------|
| <b>Median</b> | 99.64% | 99.47% | 98.47% | 99.67% | 99.78% | 99.57% | 99.77% | 99.41% | 98.20% | 99.50% |
|---------------|--------|--------|--------|--------|--------|--------|--------|--------|--------|--------|

  

|                    |             |             |             |             |             |             |             |              |              |              |
|--------------------|-------------|-------------|-------------|-------------|-------------|-------------|-------------|--------------|--------------|--------------|
|                    | <b>UL93</b> | <b>UL94</b> | <b>UL95</b> | <b>UL96</b> | <b>UL97</b> | <b>UL98</b> | <b>UL99</b> | <b>UL100</b> | <b>UL103</b> | <b>UL104</b> |
| <b>Access #</b>    | CAA35367    | CAA35368    | CAA35369    | CAA35370    | CAA35333    | CAA35334    | CAA35335    | CAA35336     | CAA35339     | CAA35341     |
| <b>Length (aa)</b> | 594         | 345         | 531         | 127         | 707         | 584         | 190         | 372          | 249          | 697          |
| <b>Min</b>         | 97.47%      | 97.97%      | 93.93%      | 97.64%      | 98.30%      | 98.97%      | 90.05%      | 96.52%       | 99.20%       | 98.71%       |
| <b>Max</b>         | 99.83%      | 99.71%      | 99.81%      | 99.21%      | 99.86%      | 99.83%      | 99.47%      | 99.73%       | 99.60%       | 99.86%       |
| <b>Mean</b>        | 98.59%      | 98.61%      | 98.39%      | 98.25%      | 99.43%      | 99.39%      | 97.76%      | 98.12%       | 99.51%       | 99.63%       |
| <b>Median</b>      | 98.65%      | 98.55%      | 98.68%      | 98.43%      | 99.43%      | 99.49%      | 97.89%      | 97.46%       | 99.60%       | 99.71%       |

  

|                    |              |              |              |              |              |              |                  |              |              |              |
|--------------------|--------------|--------------|--------------|--------------|--------------|--------------|------------------|--------------|--------------|--------------|
|                    | <b>UL105</b> | <b>UL113</b> | <b>UL114</b> | <b>UL115</b> | <b>UL116</b> | <b>UL117</b> | <b>UL118/119</b> | <b>UL120</b> | <b>UL121</b> | <b>UL122</b> |
| <b>Access #</b>    | CAA35340     | CAA35315     | CAA35316     | P16832       | CAA35318     | CAA35319     | CAA35320         | CAA35322     | CAA35323     | P19893       |
| <b>Length (aa)</b> | 956          | 684          | 250          | 603          | 603          | 424          | 346              | 201          | 180          | 411          |
| <b>Min</b>         | 98.12%       | 98.39%       | 98.00%       | 97.48%       | 91.17%       | 98.82%       | 90.06%           | 77.72%       | 92.22%       | 96.84%       |
| <b>Max</b>         | 99.90%       | 99.85%       | 100.00%      | 100.00%      | 99.68%       | 99.76%       | 99.71%           | 99.50%       | 99.44%       | 100.00%      |
| <b>Mean</b>        | 99.69%       | 99.21%       | 99.46%       | 98.32%       | 95.45%       | 99.20%       | 95.49%           | 85.78%       | 95.13%       | 99.38%       |
| <b>Median</b>      | 99.69%       | 99.27%       | 99.60%       | 98.20%       | 95.18%       | 99.29%       | 96.82%           | 84.58%       | 95.00%       | 99.76%       |

  

|                    |              |              |              |              |              |              |              |              |              |              |
|--------------------|--------------|--------------|--------------|--------------|--------------|--------------|--------------|--------------|--------------|--------------|
|                    | <b>UL123</b> | <b>UL124</b> | <b>UL130</b> | <b>UL132</b> | <b>UL133</b> | <b>UL134</b> | <b>UL135</b> | <b>UL136</b> | <b>UL137</b> | <b>UL138</b> |
| <b>Access #</b>    | CAA35325     | CAA35326     | CAA35332     | CAA35295     | AAA85872.1   | AAA85873.1   | AAA85874.1   | AAA85875.1   | AAA85876.1   | AAA85877.1   |
| <b>Length (aa)</b> | 491          | 152          | 214          | 270          | 251          | 175          | 328          | 240          | 96           | 169          |
| <b>Min</b>         | 94.09%       | 90.85%       | 97.20%       | 91.48%       | 89.15%       | 92.61%       | 97.26%       | 95.51%       | 93.8%        | 97.04%       |
| <b>Max</b>         | 99.80%       | 99.34%       | 100.00%      | 99.63%       | 99.22%       | 96.02%       | 98.48%       | 99.58%       | 97.9%        | 99.41%       |
| <b>Mean</b>        | 97.16%       | 96.60%       | 98.63%       | 94.47%       | 96.00%       | 94.53%       | 97.90%       | 97.76%       | 95.2%        | 98.35%       |
| <b>Median</b>      | 96.95%       | 96.05%       | 98.60%       | 93.33%       | 96.12%       | 94.59%       | 97.87%       | 97.92%       | 94.8%        | 98.22%       |

  

|                    |              |              |              |              |              |              |              |              |
|--------------------|--------------|--------------|--------------|--------------|--------------|--------------|--------------|--------------|
|                    | <b>UL139</b> | <b>UL141</b> | <b>UL142</b> | <b>UL144</b> | <b>UL146</b> | <b>UL147</b> | <b>UL148</b> | <b>UL149</b> |
| <b>Access #</b>    | AAA85878.1   | AAA85880.1   | AAA85881.1   | AAA85883.1   | AAA85885.1   | AAA85886.1   | AAA85887.1   | AAA85890.1   |
| <b>Length (aa)</b> | 135          | 338          | 306          | 176          | 117          | 159          | 316          | 122          |
| <b>Min</b>         | 59.85%       | 98.22%       | 80.26%       | 77.27%       | 57.26%       | 86.16%       | 97.78%       | 86.29%       |
| <b>Max</b>         | 99.26%       | 100.00%      | 97.06%       | 100.00%      | 99.15%       | 99.37%       | 99.68%       | 95.08%       |
| <b>Mean</b>        | 84.74%       | 99.01%       | 91.09%       | 87.19%       | 89.63%       | 90.90%       | 98.76%       | 91.33%       |
| <b>Median</b>      | 82.96%       | 98.82%       | 91.83%       | 82.95%       | 96.58%       | 89.94%       | 98.73%       | 90.98%       |

B)

|                 |            |            |            |            |            |            |            |             |
|-----------------|------------|------------|------------|------------|------------|------------|------------|-------------|
|                 | <b>US1</b> | <b>US2</b> | <b>US3</b> | <b>US6</b> | <b>US7</b> | <b>US8</b> | <b>US9</b> | <b>US10</b> |
| <b>Access #</b> | CAA35312   | CAA35313   | CAA35314   | CAA35273   | CAA35274   | CAA35275   | CAA35276   | CAA35277    |

|                    |        |        |        |        |        |        |        |        |
|--------------------|--------|--------|--------|--------|--------|--------|--------|--------|
| <b>Length (aa)</b> | 156    | 199    | 186    | 182    | 225    | 227    | 247    | 185    |
| <b>Min</b>         | 98.71% | 97.99% | 94.62% | 78.69% | 91.56% | 94.71% | 95.55% | 96.22% |
| <b>Max</b>         | 99.36% | 99.50% | 99.46% | 99.45% | 99.56% | 99.56% | 99.60% | 99.46% |
| <b>Mean</b>        | 99.25% | 99.24% | 98.02% | 95.39% | 95.41% | 97.66% | 98.82% | 98.20% |
| <b>Median</b>      | 99.36% | 99.50% | 97.85% | 95.63% | 95.11% | 97.80% | 98.79% | 98.38% |

|                    | <b>US11</b> | <b>US12</b> | <b>US13</b> | <b>US14</b> | <b>US15</b> | <b>US16</b> | <b>US17</b> | <b>US18</b> |
|--------------------|-------------|-------------|-------------|-------------|-------------|-------------|-------------|-------------|
| <b>Access #</b>    | CAA35278    | CAA35279    | CAA35280    | CAA35281    | CAA35282    | CAA35283    | CAA35284    | CAA35285    |
| <b>Length (aa)</b> | 215         | 281         | 261         | 310         | 262         | 309         | 293         | 274         |
| <b>Min</b>         | 98.14%      | 98.22%      | 98.85%      | 94.67%      | 98.47%      | 98.38%      | 98.29%      | 99.64%      |
| <b>Max</b>         | 99.53%      | 99.64%      | 99.62%      | 99.68%      | 100.00%     | 100.00%     | 100.00%     | 100.00%     |
| <b>Mean</b>        | 98.69%      | 98.95%      | 99.47%      | 97.60%      | 99.49%      | 99.21%      | 99.36%      | 99.67%      |
| <b>Median</b>      | 98.60%      | 98.93%      | 99.62%      | 97.42%      | 99.62%      | 99.35%      | 99.66%      | 99.64%      |

|                    | <b>US19</b> | <b>US20</b> | <b>US21</b> | <b>US22</b> | <b>US23</b> | <b>US24</b> | <b>US26</b> | <b>US27</b> |
|--------------------|-------------|-------------|-------------|-------------|-------------|-------------|-------------|-------------|
| <b>Access #</b>    | CAA35286    | P09724      | CAA35288    | CAA35289    | CAA35290    | CAA35291    | CAA35293    | CAA35259    |
| <b>Length (aa)</b> | 240         | 254         | 239         | 576         | 592         | 500         | 603         | 362         |
| <b>Min</b>         | 95.83%      | 98.82%      | 97.53%      | 99.13%      | 99.16%      | 99.00%      | 98.51%      | 95.75%      |
| <b>Max</b>         | 100.00%     | 100.00%     | 99.58%      | 99.83%      | 99.83%      | 99.80%      | 99.83%      | 99.72%      |
| <b>Mean</b>        | 98.22%      | 99.44%      | 98.07%      | 99.48%      | 99.68%      | 99.54%      | 99.22%      | 97.35%      |
| <b>Median</b>      | 98.33%      | 99.61%      | 97.94%      | 99.48%      | 99.66%      | 99.60%      | 99.17%      | 96.88%      |

|                    | <b>US28</b> | <b>US29</b> | <b>US30</b> | <b>US31</b> | <b>US32</b> | <b>US34</b> |
|--------------------|-------------|-------------|-------------|-------------|-------------|-------------|
| <b>Access #</b>    | P09704      | CAA35261    | CAA35262    | CAA35263    | CAA35264    | CAA35265    |
| <b>Length (aa)</b> | 354         | 462         | 349         | 161         | 183         | 163         |
| <b>Min</b>         | 97.74%      | 97.62%      | 95.13%      | 98.76%      | 98.36%      | 92.02%      |
| <b>Max</b>         | 99.72%      | 99.57%      | 99.71%      | 99.38%      | 99.45%      | 99.39%      |
| <b>Mean</b>        | 98.86%      | 98.79%      | 97.56%      | 99.29%      | 99.06%      | 96.12%      |
| <b>Median</b>      | 98.87%      | 98.70%      | 97.71%      | 99.38%      | 98.91%      | 96.32%      |
